# Supplementary material
Source: PubMed Central journal article supplement (PMC2966951)
Supplement: embor2010141-s1.pdf [file embor2010141-s1.pdf]

## Supplementary information

### Methods and materials

**Mutagenesis of Casp6.** ProCasp6(TETD<sup>179</sup>)C163A,D193A was generated using overlapping PCR mutagenic oligonucleotides.

**Protein preparation.** The caspases constructs were cloned in pET21b vector with a C-terminal (His)<sub>6</sub>-tag and expressed in *E. coli* Rosetta (DE3) strain at 18 °C for 20 hrs. Homogeneous proteins were obtained by two-step purification, nickel chelating column (5 ml HisTrap HP column, GE Healthcare) and gel filtration chromatography (120 ml Superdex-75, GE Healthcare), and 10 mM dithiothreitol (DTT) was added to the purified proteins. The active caspases constructs were kindly provided by Dr Guy Salvesen (Burnham Institute, CA).

### Proteolytic processing of proCasp6C163A by active caspases.

The substrate, 3 μM (0.1 μg/μL) purified caspases variants (proCasp6C163A, Casp6D193A, proCasp6(TETD<sup>179</sup>)C163A,D193A or Casp3C163A) was incubated with 30 nM (1 ng/μL) active Casp6, Casp7, Casp8 or Casp6D193A (Fig. S2) in 20 mM HEPES, pH 7.4, 50 mM NaCl, 2 mM EDTA, 0.1% CHAPS and 5 mM DTT at 37°C for 24 hrs. Samples were analyzed by 15% SDS-PAGE.

**Fig. S1**

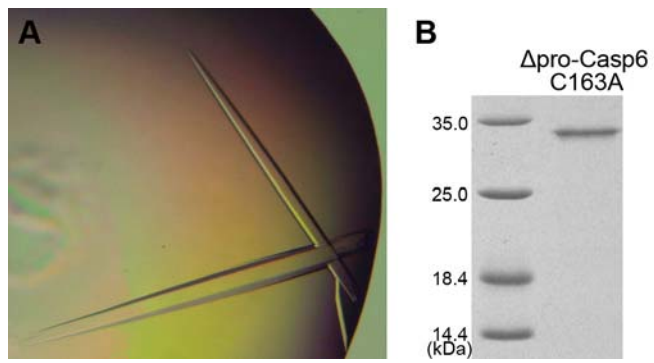

Fig. S1. The  $\Delta$ pro-Casp6C163A was expressed as a single contiguous peptide. **(A)** The crystals of  $\Delta$ pro-Casp6C163A. **(B)** Coomassie-stained SDS-PAGE gel of the crystals of  $\Delta$ pro-Casp6C163A. The crystals in **(A)** were dissolved in water and analyzed by SDS-PAGE.

**Fig. S2**

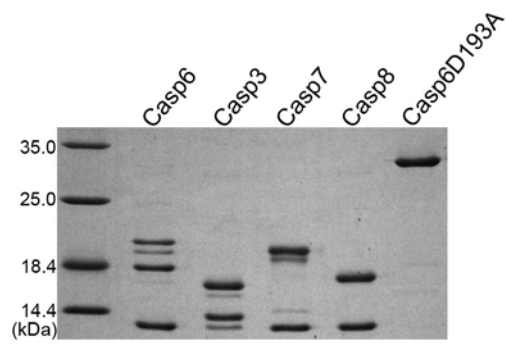

Fig. S2. Coomassie blue-stained SDS-PAGE gel showing all of the proteins used as active enzyme in this study. Each lane contains 1  $\mu$ l of the proteins at a concentration of 1  $\mu$ g/ $\mu$ l.

**Fig. S3**

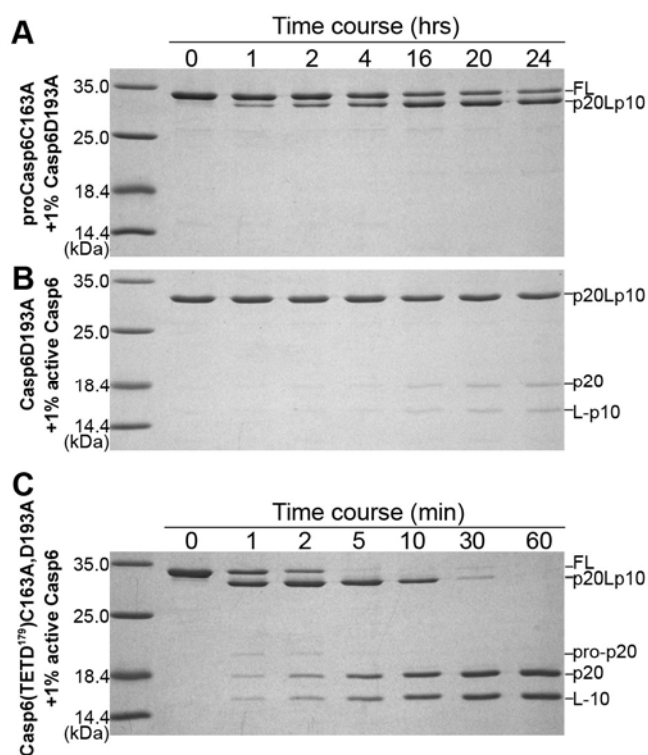

Fig. S3. TETD<sup>23</sup> is a much better substrate for Casp6 than DVVD<sup>179</sup>. Coomassie blue-stained gel of (A) proCasp6C163A cleaved by 1% Casp6D193A, showing Casp6D193A has the ability to cleave proCasp6C163A at D23; (B) Casp6D193A cleaved by 1% active Casp6, showing active Casp6 only slightly cleaved Casp6D193A at D179; and (C) Casp6(TETD<sup>179</sup>)C163A,D193A cleaved by 1% active Casp6, showing that when DVVD<sup>179</sup> was mutated to TETD, active Casp6 efficiently cleaved proCasp6(TETD<sup>179</sup>)C163A,D193A at the new D179 (TETD) site.

**Fig. S4**

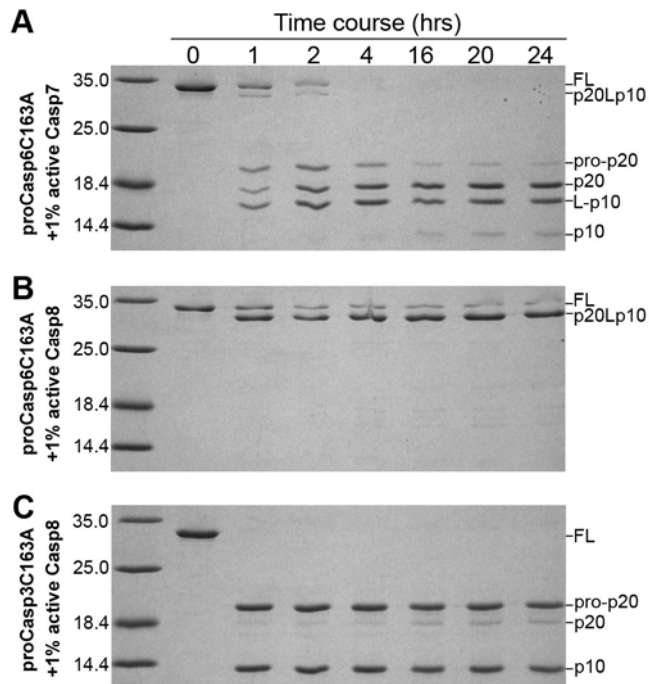

Fig. S4. Casp6 processed by other caspases. **(A)** Pro-Casp6C163A cleaved by 1% active Casp7. **(B)** Pro-Casp6C163A cleaved by 1% active Casp8. **(C)** Pro-Casp3C163A cleaved by 1% active Casp8, as a control to show Casp8 has high activity.

**Fig. S5**

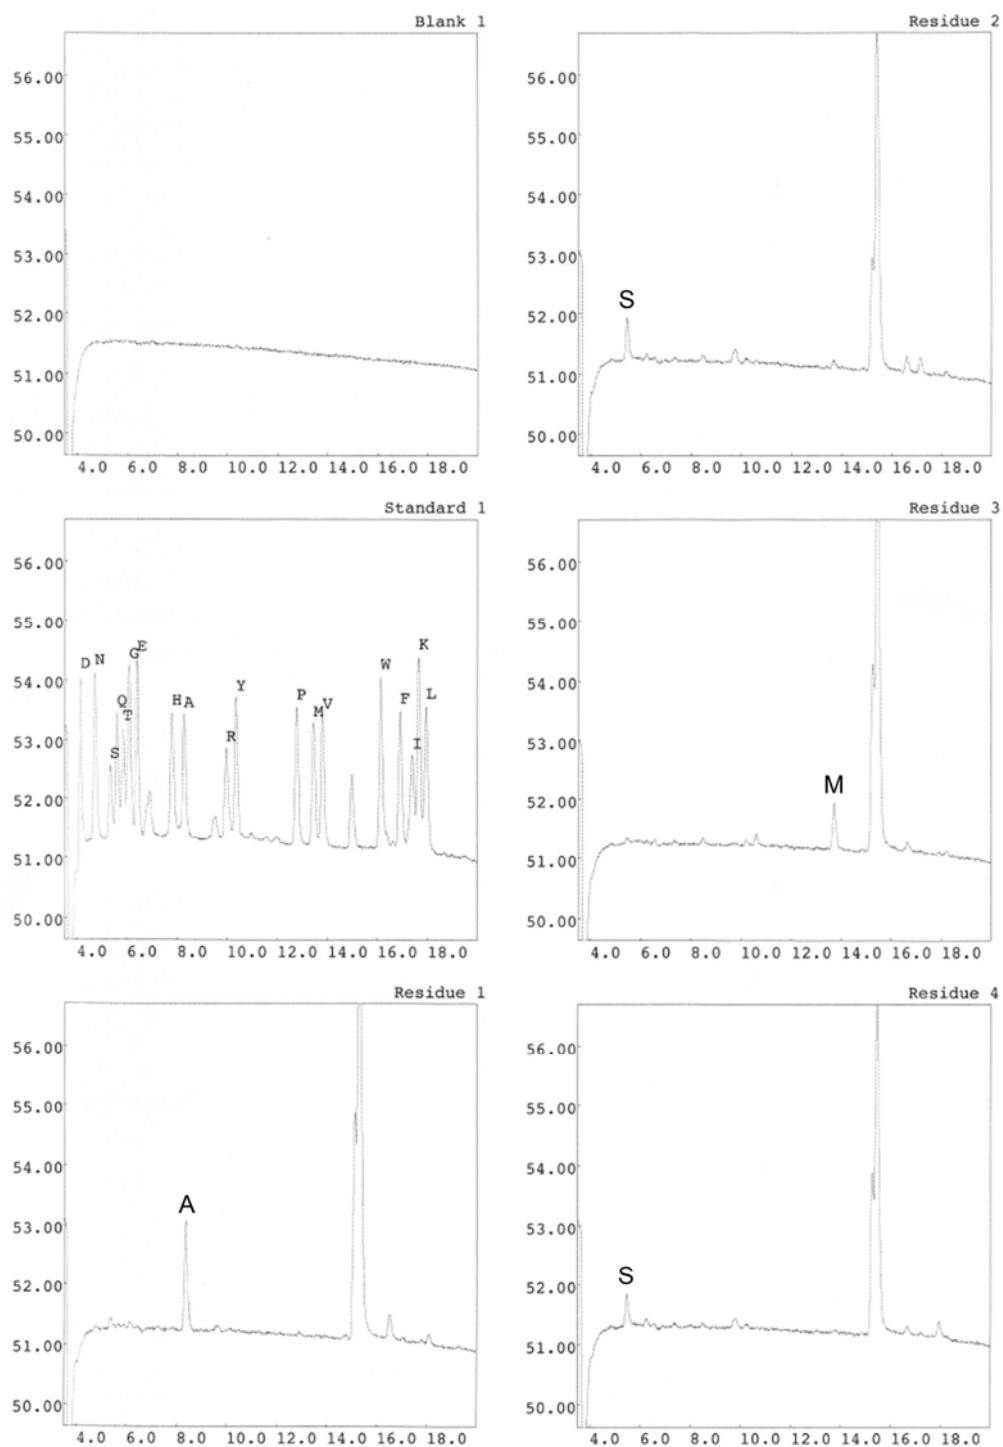

Fig. S5. N-terminal sequencing result of the pro-p20 band of Fig. 2I. The N-terminal four residues were sequenced by Edman degradation, and the sequence of the pro-p20 band was ASMS. The mutant proCasp6D23A was cloned in pET21b vector between *NheI* and *XhoI*, and N-terminal sequence of the translated protein was MASMSSAS, and the first methionine was cleaved when expressed in bacteria.

**Fig. S6**

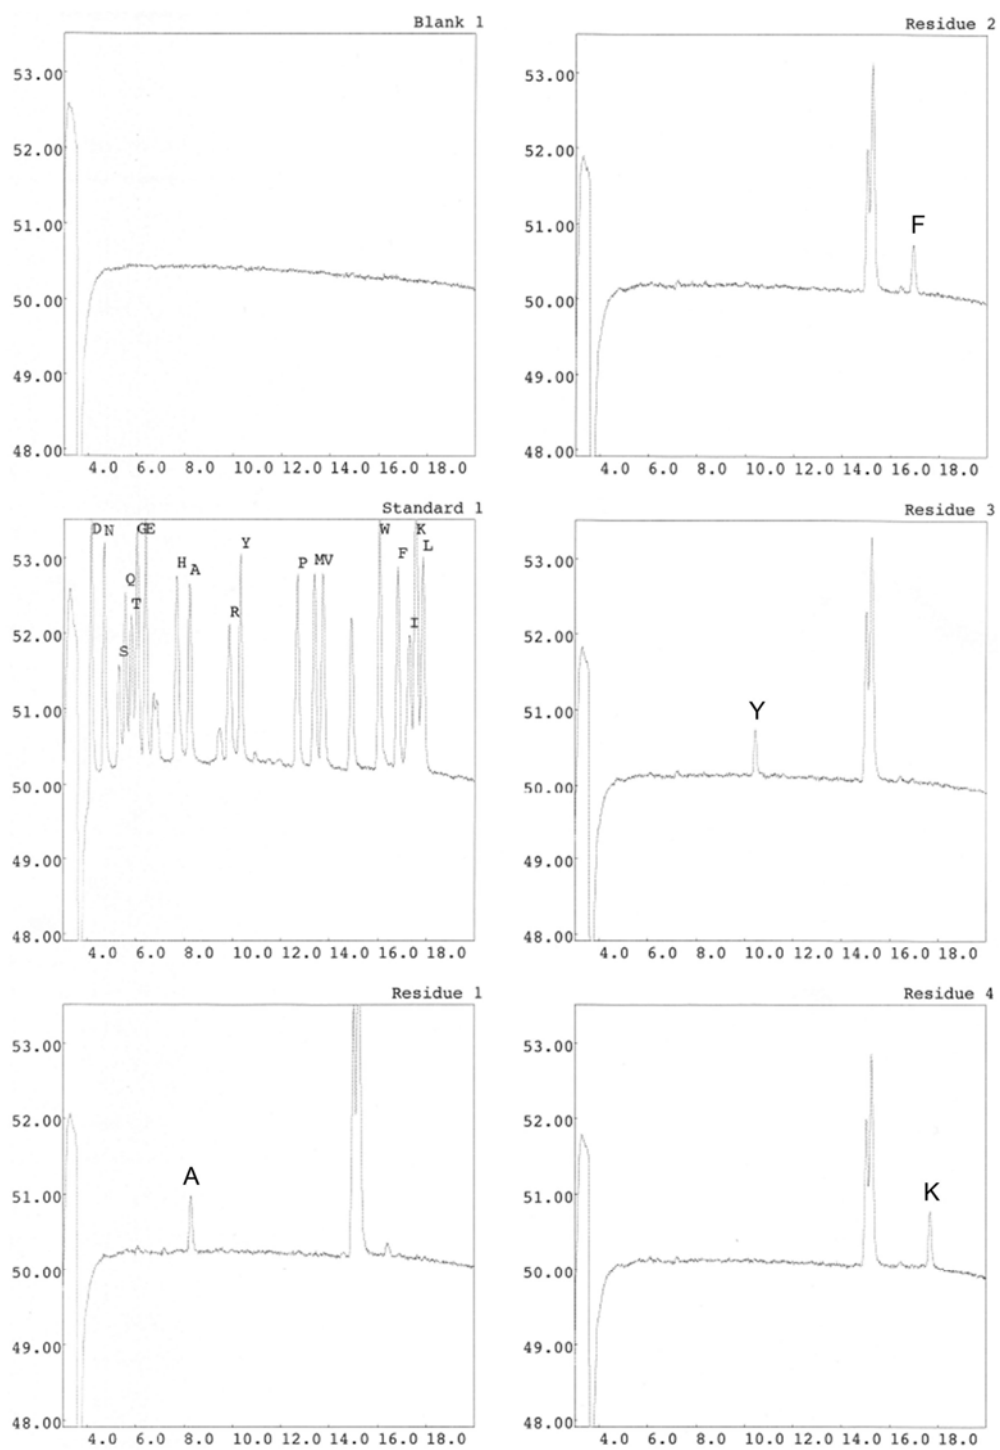

Fig. S6. N-terminal sequencing result of the p20L band of Fig. 2I. The N-terminal four residues were sequenced by Edman degradation, and the sequence was AFYK, which are the 24 to 27 residues of Casp6.
